# Supplementary material for: Magnetic Fe3O4@C@Cu2O composites with bean-like core/shell nanostructures: Synthesis, properties and application in recyclable photocatalytic degradation of dye pollutants
Source: Royal Society of Chemistry journal article supplement (doi:10.1039/c0jm04569a), 2011-01-01
Supplement: c0jm04569a.pdf [file c0jm04569a.pdf]

**Supporting Information**  
**for**  
**Magnetic Fe<sub>3</sub>O<sub>4</sub>@C@Cu<sub>2</sub>O Composites with Bean-like**  
**Core/Shell Nanostructures: Synthesis, Properties and**  
**Application in Recyclable Photocatalytic Degradation of Dye**  
**Pollutants**

Shi-Kuo Li, Fang-Zhi Huang, Yang Wang, Yu-Hua Shen<sup>\*</sup>, Ling-Guang Qiu,  
An-Jian Xie<sup>\*</sup>, Shou-Jiao Xu

School of Chemistry and Chemical Engineering, Anhui University, 230039, Hefei,  
China

To whom correspondence should be addressed. E-mail address: s\_yuhua@163.com,  
anjx@163.com. Tel.: +86-551-5108702; Fax: +86-551-5108702.

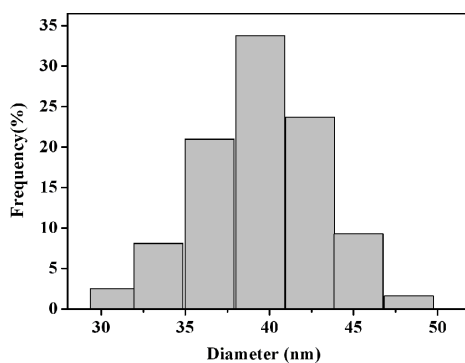

Figure S1. Histogram of size distribution of the as-prepared Fe<sub>3</sub>O<sub>4</sub> nanoparticles.

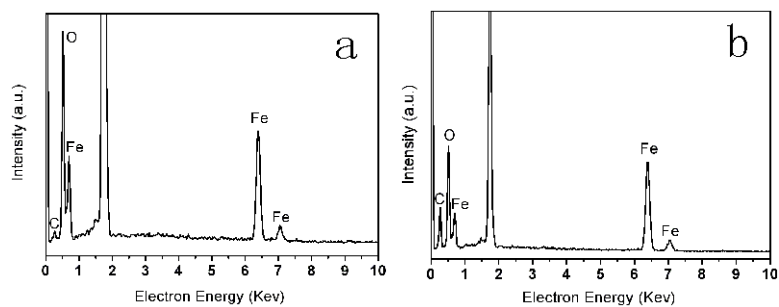

Figure S2. EDX spectra of the as-prepared Fe<sub>3</sub>O<sub>4</sub> nanoparticles (a), and Fe<sub>3</sub>O<sub>4</sub>@C microspheres (b), respectively.

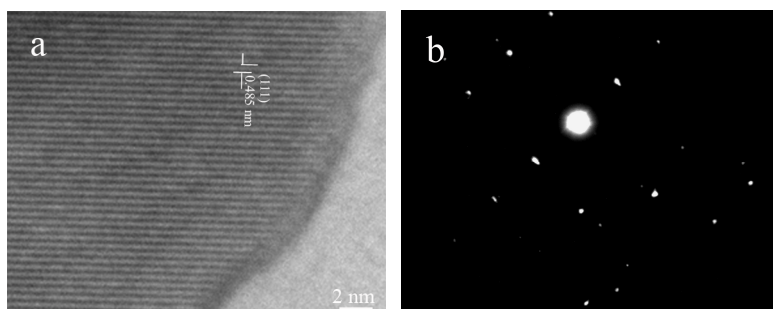

Figure S3. HRTEM image (a) and SAED pattern (b) of the as-prepared Fe<sub>3</sub>O<sub>4</sub> nanoparticles.

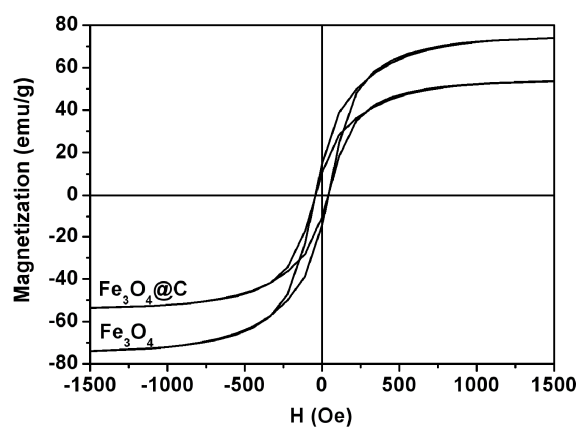

Figure S4. Hysteresis loops measured at 300 K for the as-prepared Fe<sub>3</sub>O<sub>4</sub> nanoparticles and Fe<sub>3</sub>O<sub>4</sub>@C microspheres.

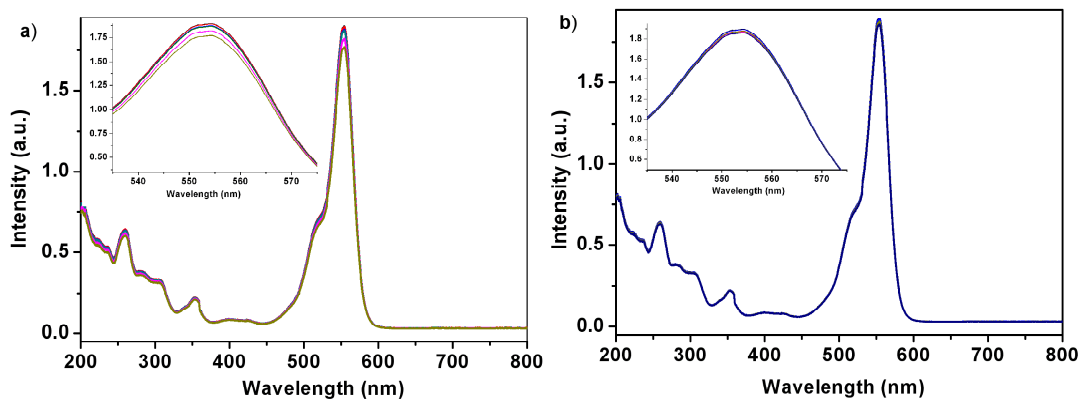

Figure S5. a) Time-dependent absorption of 50 mL  $1.0 \times 10^{-4}$  M RhB solution under visible-light irradiation in the absence of the as-prepared magnetic  $\text{Fe}_3\text{O}_4@\text{C}@\text{Cu}_2\text{O}$  core/shell composites; b) Similar solution with (a) was performed in dark in the presence of  $\text{Fe}_3\text{O}_4@\text{C}@\text{Cu}_2\text{O}$  composites (50 mg).

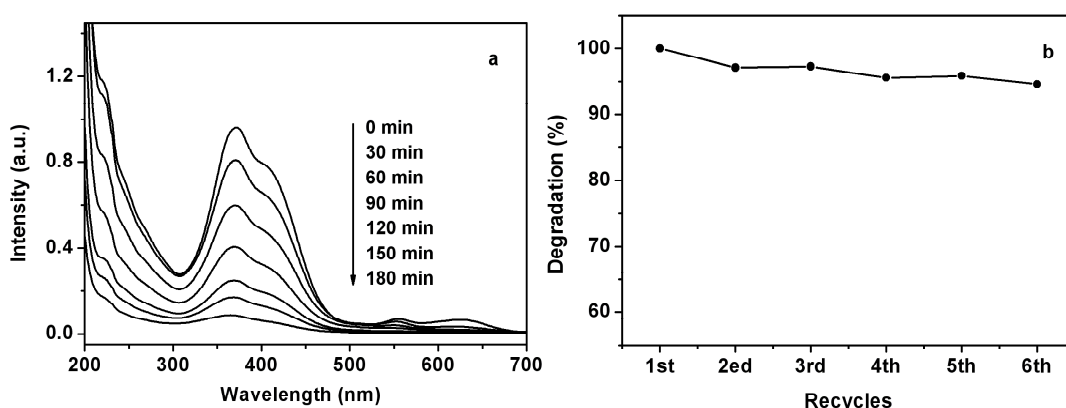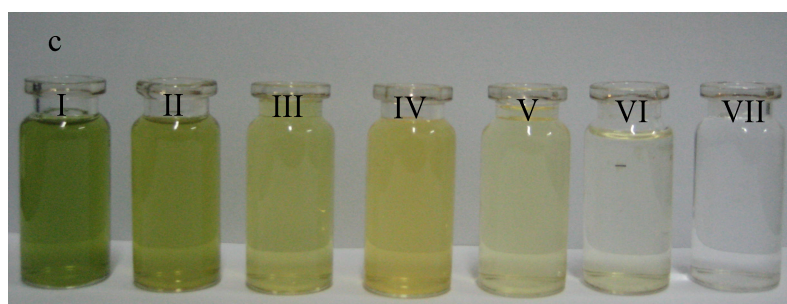

Figure S6. a) Time-dependent absorption of the practical polluted water under visible-light irradiation in the presence of the as-prepared magnetic  $\text{Fe}_3\text{O}_4@\text{C}@\text{Cu}_2\text{O}$  core/shell composites (50 mg); b) 6 cycles of the degradation of the practical polluted water on the magnetic  $\text{Fe}_3\text{O}_4@\text{C}@\text{Cu}_2\text{O}$  composites; c) Photographs of the corresponding degraded practical polluted water.
